# Supplementary material for: Comparison of perovskite and perovskite derivatives for use in anion-based pseudocapacitor applications
Source: Royal Society of Chemistry journal article supplement (doi:10.1039/c9ta06094d), 2019-01-01
Supplement: c9ta06094d1.pdf [file c9ta06094d1.pdf]

Supporting Information

**Comparison of Perovskite and Perovskite Derivatives for use in Anion-based Pseudocapacitor Applications**

Robin P. Forslund<sup>1</sup>, Joshua Pender<sup>1</sup>, Caleb T. Alexander<sup>2</sup>, Keith P. Johnston<sup>2</sup> & Keith J. Stevenson<sup>3\*</sup>

<sup>1</sup> Department of Chemistry, The University of Texas at Austin, 1 University Station, Austin, Texas 78712, USA.

<sup>2</sup> McKetta Department of Chemical Engineering, The University of Texas at Austin, 200 E Dean Keeton St., Austin, Texas 78712, USA.

<sup>3</sup> Center for Energy Science and Technology, Skolkovo Institute of Science and Technology, Bolshoi Boulevard 30, Moscow 121205, Russia.

\* Corresponding author: K.Stevenson@skoltech.ru

## Contents

|                                                                                                                                           |    |
|-------------------------------------------------------------------------------------------------------------------------------------------|----|
| Figure S1: BET surface area sorption curves .....                                                                                         | S3 |
| Figure S2: Additional SEM images of $\text{CaMnO}_{3-\delta}$ (CMO) perovskite oxide .....                                                | S3 |
| Figure S3: Additional SEM images of $\text{Ca}_2\text{MnO}_{4-\delta}$ (CMO RP) Ruddlesden-Popper oxide .....                             | S4 |
| Figure S4: Mn 3p XPS analysis .....                                                                                                       | S4 |
| Figure S5: Electrochemical characterization of unreduced $\text{CaMnO}_{3-\delta}$ and $\text{Ca}_2\text{MnO}_{4-\delta}$ materials ..... | S5 |
| Figure S6: PXRD pattern of $\text{SrFeO}_{2.5}$ (SFO) .....                                                                               | S5 |
| Figure S7: Two-electrode capacitances measured via CV .....                                                                               | S6 |
| Table S1: Electrochemically measured oxygen diffusion rates.....                                                                          | S6 |

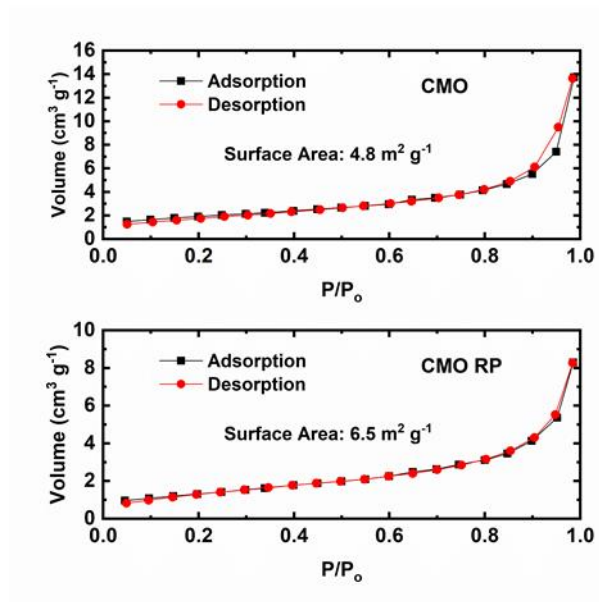

**Figure S1.** Nitrogen sorption isotherms for BET surface area analysis of unreduced CaMnO<sub>3.6</sub> (CMO) perovskite and Ca<sub>2</sub>MnO<sub>4.6</sub> (CMO RP) Ruddlesden-Popper oxides.

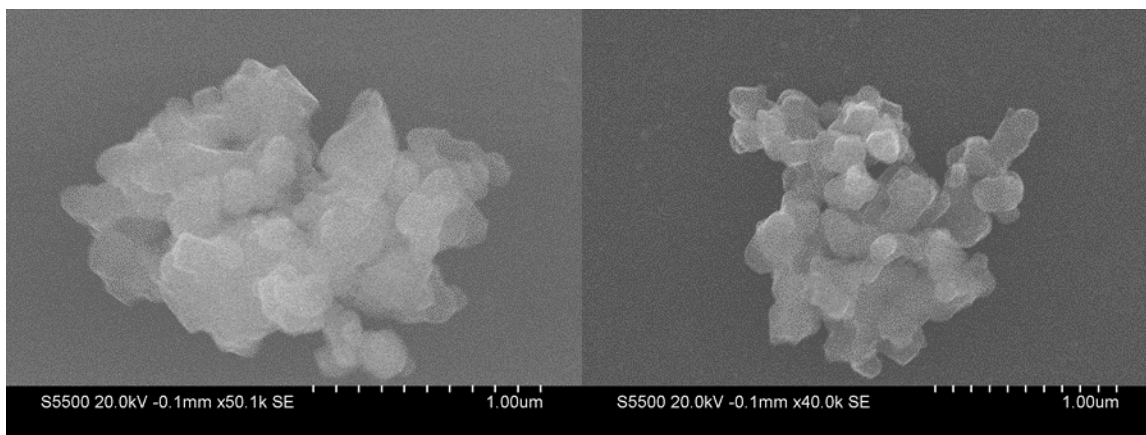

**Figure S2.** Additional SEM images of CaMnO<sub>3.6</sub> (CMO) perovskite oxide.

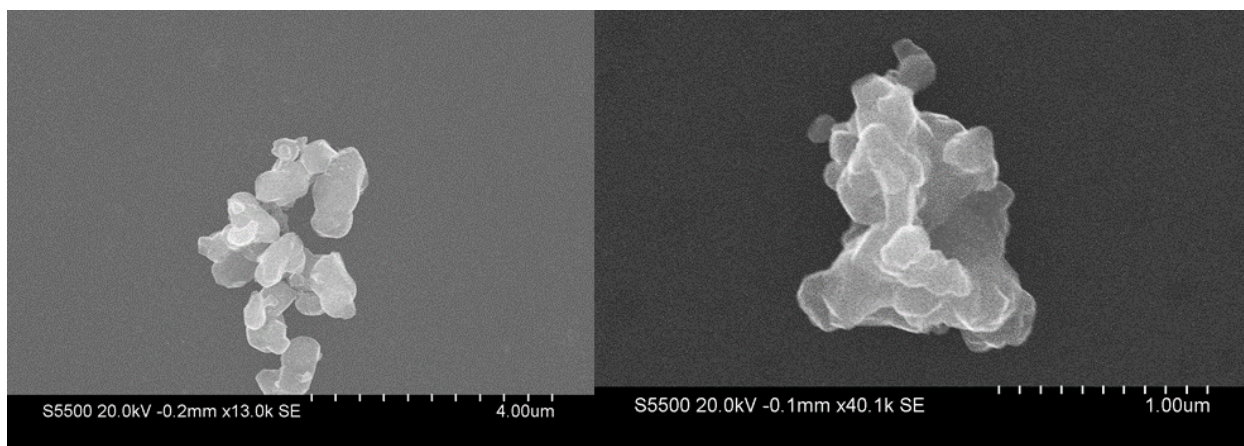

**Figure S3.** Additional SEM images of  $\text{Ca}_2\text{MnO}_{4-\delta}$  (CMO RP) Ruddlesden-Popper oxide.

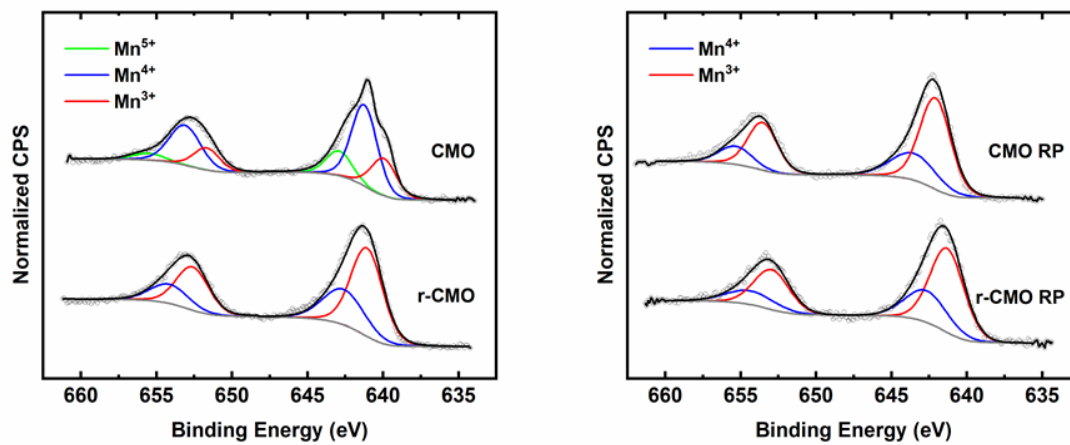

**Figure S4.** Mn 3p XPS analysis of  $\text{CaMnO}_{3-\delta}$  (CMO) perovskite and  $\text{Ca}_2\text{MnO}_{4-\delta}$  (CMO RP) Ruddlesden-Popper oxides before and after reduction in a reducing atmosphere of 7%  $\text{H}_2$  in Ar at 325° C.

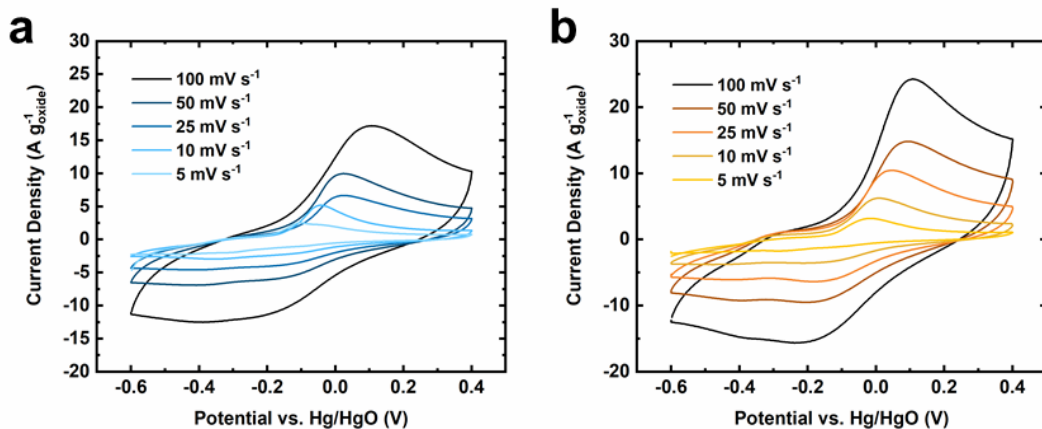

**Figure S5.** Electrochemical characterization of unreduced  $\text{CaMnO}_{3-\delta}$  and  $\text{Ca}_2\text{MnO}_{4-\delta}$  materials as pseudocapacitors in a 3-electrode cell. (a) CVs of CMO performed at multiple scan rates over a 1 V window. (b) CVs of CMO RP performed at multiple scan rates over a 1 V window.

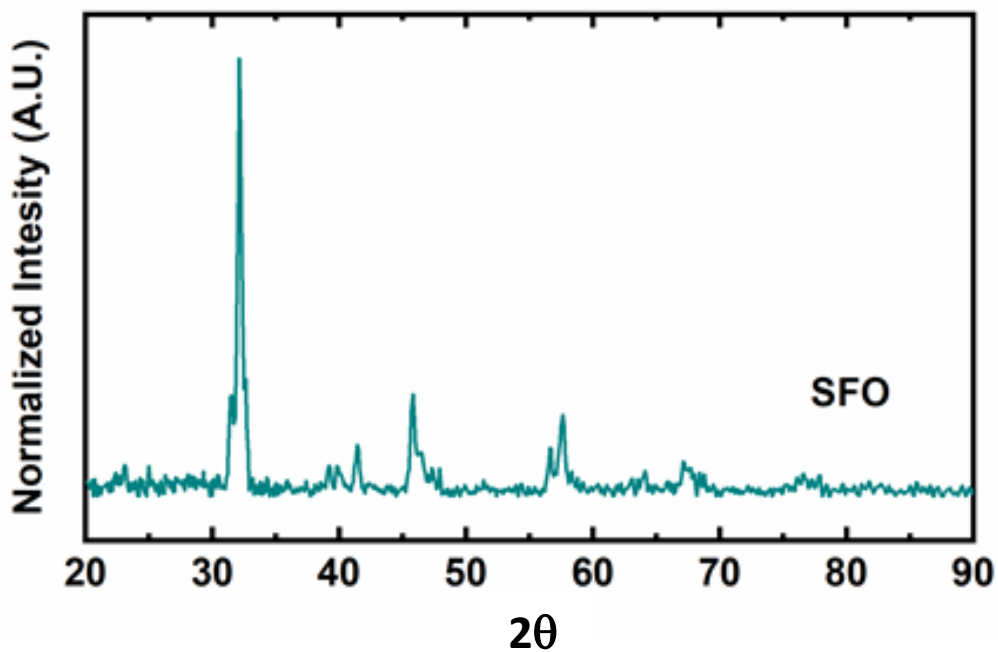

**Figure S6.** PXRD pattern of  $\text{SrFeO}_{2.5}$  (SFO). Reduction of  $\text{SrFeO}_3$  perovskite was performed in an atmosphere of 7%  $\text{H}_2/\text{Ar}$  at 325°C to achieve the Brownmillerite phase.

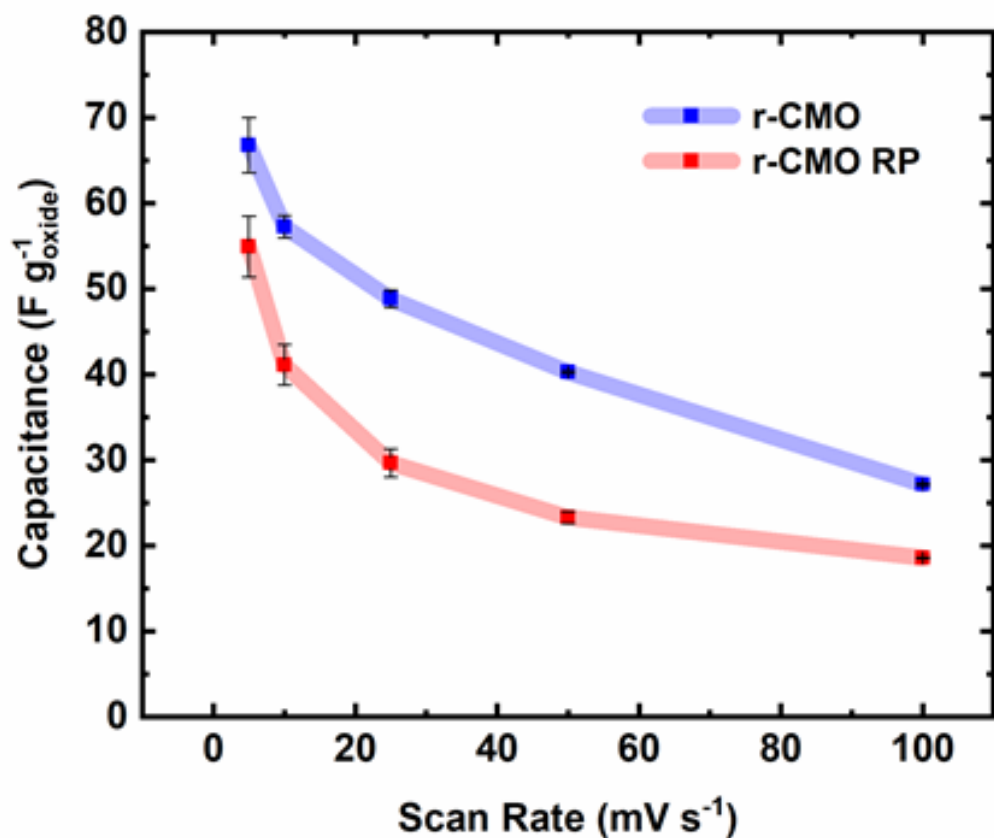

**Figure S7.** Gravimetric capacitances determined from CVs at various scan rates using SrFeO<sub>2.5</sub> as the anode material and either r-CMO or r-CMO RP as the cathode material in two-electrode cell asymmetric pseudocapacitor experiments.

**Table S1.** Electrochemically measured oxygen diffusion rates in CaMnO<sub>3-δ</sub> (CMO) perovskite and Ca<sub>2</sub>MnO<sub>4-δ</sub> (CMO RP) Ruddlesden-Popper oxides.

| Sample   | Composition                         | Intercalation Oxygen Diffusion Rate (cm <sup>2</sup> s <sup>-1</sup> ) | Deintercalation Oxygen Diffusion Rate (cm <sup>2</sup> s <sup>-1</sup> ) |
|----------|-------------------------------------|------------------------------------------------------------------------|--------------------------------------------------------------------------|
| CMO      | CaMnO <sub>3.11</sub>               | 1.88E-11 ± 5.7E-12                                                     | 2.44E-11 ± 3.6E-12                                                       |
| r-CMO    | CaMnO <sub>2.53</sub>               | 2.64E-11 ± 2.8E-12                                                     | 3.71E-11 ± 1.2E-12                                                       |
| CMO RP   | Ca <sub>2</sub> MnO <sub>3.92</sub> | 3.54E-12 ± 1.4E-12                                                     | 1.68E-12 ± 3.6E-13                                                       |
| r-CMO RP | Ca <sub>2</sub> MnO <sub>3.61</sub> | 1.60E-11 ± 8.6E-14                                                     | 1.44E-11 ± 4.9E-14                                                       |
